# Supplementary material for: Unlocking chloride sensing in the red at physiological pH with a fluorescent rhodopsin-based host
Source: Royal Society of Chemistry journal article supplement (doi:10.1039/d3cc01786a), 2023-01-01
Supplement: d3cc01786a2.xlsx [file d3cc01786a2.xlsx]

## Sheet: Sheet1
Uniprot ID	Protein Name	Organism
A0A022VWV4	Heat shock protein 30	Trichophyton rubrum
A0A022XLX9	Heat shock protein 30	Trichophyton soudanense
A0A059J7C3	Heat shock protein 30	Trichophyton interdigitale
A0A060TI52	ARAD1D36212p	Blastobotrys adeninivorans
A0A061B1F4	30 kDa heat shock protein	Cyberlindnera fabianii
A0A061BHV4	RHOTO0S22e00342g1_1	Rhodosporidium toruloides
A0A063ZS75	Rhodopsin	Halostagnicola sp.
A0A292PVL0	Family A GPCR-like protein	Tuber aestivum
A0A2A5FXF6	Biphenyl 2,3-dioxygenase	Hyphomicrobiales bacterium
A0A2D8K187	Biphenyl 2,3-dioxygenase	Rhizobiaceae bacterium
A0A2E6K8D6	Biphenyl 2,3-dioxygenase	Altererythrobacter sp.
G8YTK4	Piso0_000285 protein	Pichia sorbitophila
G8YV11	Piso0_000285 protein	Pichia sorbitophila
G8ZTK2	Uncharacterized protein	Torulaspora delbrueckii
H0GCC6	Yro2p	Saccharomyces cerevisiae
H0GDZ7	Mrh1p	Saccharomyces cerevisiae x Saccharomyces kudriavzevii
H0GR77	Yro2p	Saccharomyces cerevisiae x Saccharomyces kudriavzevii
H0GSK5	Mrh1p	Saccharomyces cerevisiae x Saccharomyces kudriavzevii
H8X0C9	Hsp30 heat shock protein	Candida orthopsilosis
I2GYB7	30 kDa heat shock protein	Tetrapisispora blattae
J5PU34	MRH1-like protein	Saccharomyces kudriavzevii
J6EEE6	YRO2-like protein	Saccharomyces kudriavzevii
J7R9K8	Uncharacterized protein	Kazachstania naganishii
J8LRP2	Yro2p	Saccharomyces arboricola
K0KNN8	Membrane protein	Wickerhamomyces ciferrii
K0KS51	Membrane protein	Wickerhamomyces ciferrii
L0AG52	Bacteriorhodopsin	Natronobacterium gregoryi
L0AJP7	Rhodopsin	Natronobacterium gregoryi
L0AML8	Bacteriorhodopsin-like protein	Natronobacterium gregoryi
L1K0X2	Rhodopsin	Guillardia theta
L9UW91	Rhodopsin	Natrialba magadii
L9WY63	Rhodopsin	Natronolimnohabitans innermongolicus
L9ZQQ2	Rhodopsin	Natrialba taiwanensis
L9ZSQ7	Rhodopsin	Natrialba taiwanensis
L9ZVS9	Rhodopsin	Natrialba hulunbeirensis
L9ZXV3	Rhodopsin	Natrialba hulunbeirensis
M0A1V5	Rhodopsin	Natrialba hulunbeirensis
M0A592	Rhodopsin	Natrialba chahannaoensis
M0AHZ0	Rhodopsin	Natrialba asiatica
M0AM34	Rhodopsin	Natrialba asiatica
M0AUH7	Rhodopsin	Natrialba chahannaoensis
M0B4K4	Rhodopsin	Natrialba aegyptia
M0BDC2	Rhodopsin	Natrialba aegyptia
M0EW42	Rhodopsin	Halorubrum coriense
M0LHI0	Rhodopsin	Halobiforma lacisalsi
M0LQM6	Rhodopsin	Halobiforma nitratireducens
M0LT05	Rhodopsin	Halobiforma nitratireducens
M0LVH9	Rhodopsin	Halobiforma lacisalsi
M0LW98	Rhodopsin	Halobiforma lacisalsi
M0M6W4	Rhodopsin	Halobiforma nitratireducens
M3IKA7	30 kDa heat shock protein	Candida maltose
M5FSE0	Heat shock protein 30	Dacryopinax primogenitus
M5FX62	Heat shock protein 30	Dacryopinax primogenitus
M5G368	Heat shock protein 30	Dacryopinax primogenitus
M5G956	Heat shock protein 30	Dacryopinax primogenitus
M5G966	Heat shock protein 30	Dacryopinax primogenitus
M7X5D2	Protein of bacterial rhodopsin family	Rhodosporidium toruloides
N1P6F2	Mrh1p	Saccharomyces cerevisiae
N1PAR8	Yro2p	Saccharomyces cerevisiae
P38079	YRO2	Saccharomyces cerevisiae
Q12117	MRH1	Saccharomyces cerevisiae
Q6FM12	Uncharacterized protein	Candida glabrata
Q6FRA9	MRH1	Candida glabrata
A0A7Y0AY70	Bacteriorhodopsin	Rhizobium terricola
A0A812N292	Post-GPI attachment to proteins factor 3	Symbiodinium natans
A0A812PVC7	Uncharacterized protein	Symbiodinium sp.
A0A812Q0H5	Uncharacterized protein	Symbiodinium sp.
A0A812SZE1	Uncharacterized protein	Symbiodinium sp.
A0A830H4C8	Uncharacterized protein	Pycnococcus provasolii
A0A830HRR5	Transmembrane portein	Pycnococcus provasolii
A0A833LJT0	Biphenyl 2,3-dioxygenase	Bauldia sp.
A0A838M3D0	Biphenyl 2,3-dioxygenase	Rhizobiaceae bacterium
A0A8B8ULK6	Yro2	Saccharomyces paradoxus
A0A8B8UNQ5	Mrh1	Saccharomyces paradoxus
A0A8H2VD65	Similar to YDR033W MRH1	Kazachstania barnettii
A0A8H2ZIU8	Similar to YDR033W MRH1	Kazachstania barnettii
A0A8H7ZLL5	HSP31	Candida metapsilosis
A0A8I0E070	Bacteriorhodopsin	Rhizobium sp.
A0A8J2T6J8	ZYBA0S03-08790g1_1	Zygosaccharomyces bailii
A0A8J5QQ98	30 kDa heat shock protein	Candida subhashii
N1PAR8	Yro2p	Saccharomyces cerevisiae
P38079	YRO2	Saccharomyces cerevisiae
Q12117	MRH1	Saccharomyces cerevisiae
Q6FM12	Glycerol uptake facilitator	Candida glabrata
Q6FRA9	MRH1	Candida glabrata
A0A7Y0AY70	Bacteriorhodopsin	Rhizobium terricola
